# Supplementary material for: Effect of freeze-dried Carica papaya leaf juice on inflammatory cytokines production during dengue virus infection in AG129 mice
Source: PubMed Central journal article supplement (PMC6371484; doi:10.1186/s12906-019-2438-3), 2019-02-11
Supplement: 12906_2019_2438_MOESM3_ESM.pdf [file 12906_2019_2438_MOESM3_ESM.pdf]

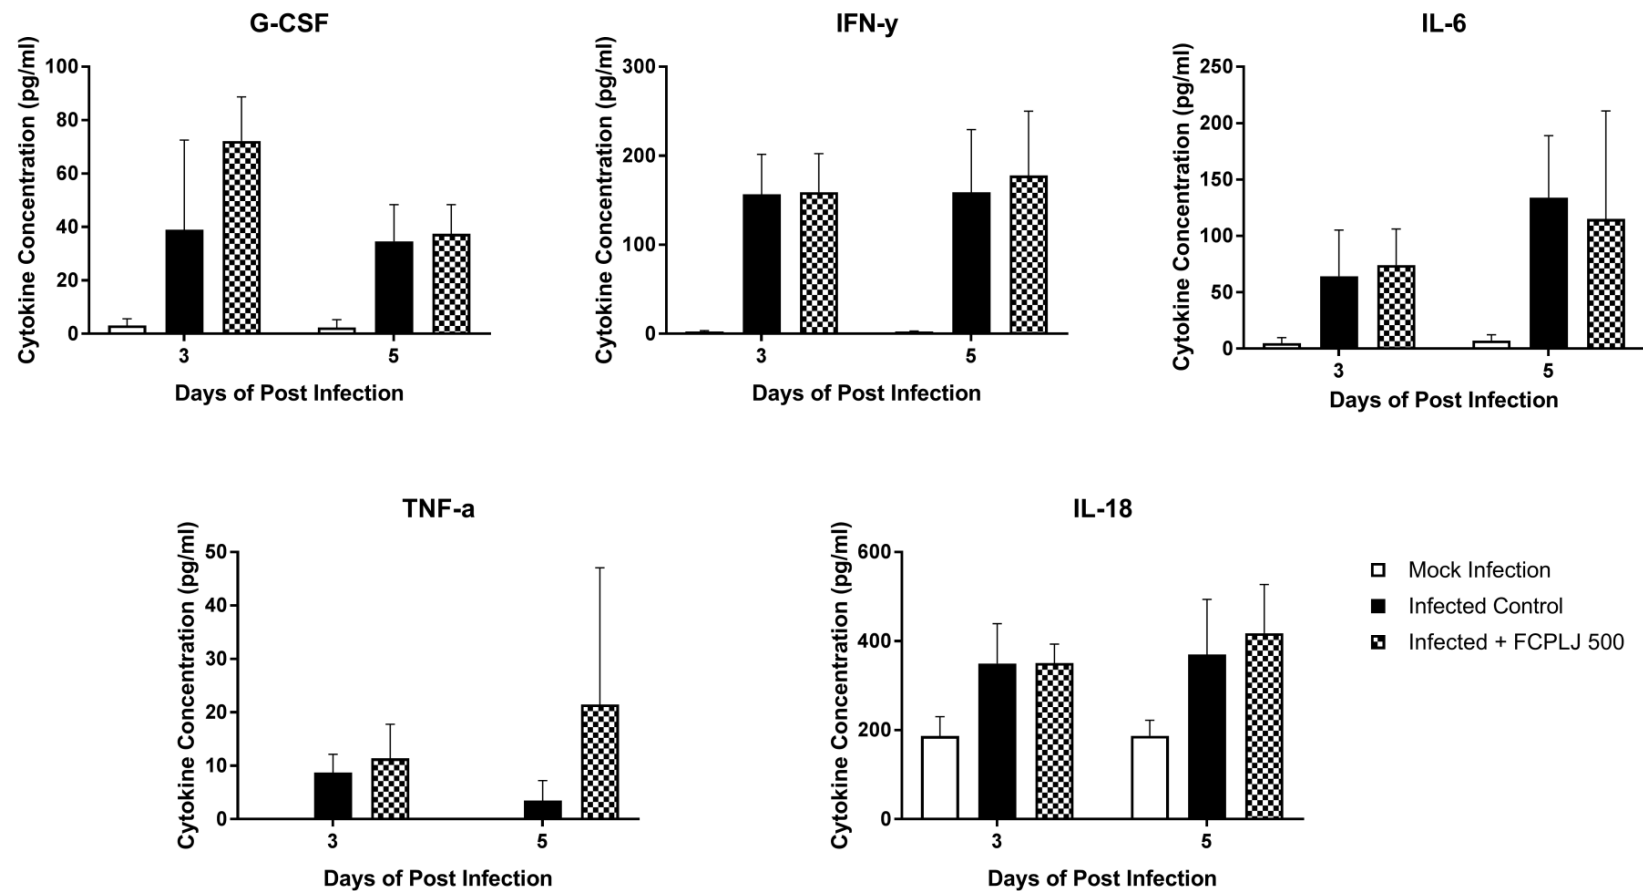

**Figure S2.** The cytokine level in plasma collected from mock infection (white bars), infected (black bars) and infected + FCPLJ (checkered bars) AG129 mice groups at day 3 and day 5 post-infection were analyzed by Procartaplex immunoassay. The treated group was given 500 mg/kg BW of FCPLJ. Bars represent the mean values  $\pm$  SEM. The cytokine level was compared between experimental groups using ANOVA multiple comparison test. There was no significant difference between observed groups.
